# Supplementary material for: Increasing transparency in indirect treatment comparisons: is selecting effect modifiers the missing part of the puzzle? A review of methodological approaches and critical considerations
Source: Atypon-hosted journal article supplement (doi:10.57264/cer-2023-0046), 2023-08-21
Supplement: supplementary materials.docx [file supplementary%20materials.docx]

Supplementary Table 1. Combined Embase and MEDLINE Search (via Ovid)

| **#** | **Search Terms** | **25 November 2021** | **24 February 2023** |
| --- | --- | --- | --- |
| 1 | (((treatment$ or effect$) adj modif$) or effect-modif$ or effectmodif$ or prognostic factor$ or prognostic variable$ or predictor variable$ or predictor factor$).ti,ab. | 335,249 | 372,690 |
| 2 | (review or systematic or literature or meta-analysis or meta-analyses or metaanalysis or metaanalyses).ti. | 1,476,085 | 1,726,904 |
| 3 | 1 and 2 | 11,200 | 13,009 |
| 4 | ((multiple treatment$ or indirect or mixed or population-adjusted or matching-adjusted or simulated treatment) adj2 comparison$).ti,ab. | 9,367 | 10,730 |
| 5 | ("network meta-analysis" or "network meta-analyses" or "network metaanalysis" or "network metanalayses").ti,ab. | 15,321 | 20,864 |
| 6 | (meta regression$ or metaregression$).ti,ab. | 25,509 | 31,662 |
| 7 | (comparative efficacy or comparative effectiveness).ti,ab. | 31,340 | 35,582 |
| 8 | or/4-7 | 74,890 | 90,470 |
| 9 | 3 and 8 | 727 | 894 |
| 10 | limit 9 to english language | 721 | 888 |
| 11 | remove duplicates from 10 | 420 | 511 |

Supplementary Table 2. Health Technology Assessment Submission Search Strategy

| **HTA Body** | **Search Approach** |
| --- | --- |
| CADTH | Selected ‘Reimbursement Review’ under ‘Reports’ and downloaded the full list of reimbursement submissions as a Microsoft Excel file.   - Filtered for ‘lung’, ‘NSCLC’, non-small-cell’, ‘non small cell’, and ‘psoriasis’ as therapeutic indication. - Filtered for submissions that were either active, completed, pending or received. Submissions for which no status information was available were also reviewed. - Filtered by the date of the recommendation issues (2015 onwards). Submissions for which no date information was available were also reviewed. |
| NICE | - Reviewed the NICE pathway for ‘lung cancer’ and ‘psoriasis’. - Searched for ‘lung cancer’, ‘NSCLC’, and ‘psoriasis’ using the free-text search interface. Under ‘Guidance Programme’, selected the filter ‘Technology Appraisal Guidance’. |

Abbreviations: CADTH = Canadian Agency for Drugs and Technologies in Health; HTA = health technology assessment; NICE = national Institute for Health and Care Excellence

Supplementary Table 3. Included Published Indirect Treatment Comparisons

| **Author (Year)** | **Article Type** | **Analysis Type** | **Indication** | **Sources for EM Identification** |
| --- | --- | --- | --- | --- |
| Al-Moraissi (2020)[1] | Article | NMA | Maxillary sinus augmentation | Unclear |
| Bourdin (2018)[2] | Article | MAIC | Asthma | Unclear |
| Cope (2015)[3] | Review | NMA | Atrial fibrillation | Challenges highlighted in SLRs |
| Cope (2020)[4] | Review | NMA and MAIC | Multiple myeloma | Expert opinion |
| Furukawa (2016)[5] | Published protocol | IPD-NMA | Depressive disorder | Literature review |
| Furukawa (2018)[6] | Published protocol | IPD-NMA | Depressive disorder | Literature review |
| Kanters (2022)[7] | Article | NMA | HIV | Literature review |
| Kovic (2017)[8] | Review | NMA | N/A (EM reporting in NMAs) | Challenges highlighted in SLRs |
| McGirr (2019)[9] | Article | NMA | Pneumococcal disease in children | Unclear |
| Menzies-Gow (2022)[10] | Article | NMA and STC | Asthma | Expert opinion and literature review |
| Nikolin (2022)[11] | Published protocol | NMA | Depression | Unclear |
| Phillippo (2019)[12] | Review | NMA (in NICE TAs) | Multiple indications | Expert opinion |
| Rose (2022)[13] | Article | NMA | Multiple myeloma | Expert opinion and literature review |
| Saramago (2021)[14] | Article | NMA | Generalised anxiety disorder | Literature review |
| Veroniki (2015)[15] | Published protocol | IPD-NMA | Type 1 diabetes | IPD analysis |
| Wade (2020)[16] | Review | NMA (in NICE TAs) | Psoriasis | Expert opinion |
| Wright (2021)[17] | Review | NMA | Psoriasis | Unclear |

Abbreviations: EM = effect modifier; IPD = individual patient data; MAIC = matching-adjusted indirect comparison; N/A = not applicable; NMA = network meta-analysis; SLR = systematic literature review; STC = simulated treatment comparison; TA = technology appraisal

**REFERENCES**

[1] Al-Moraissi E, Alkhutari A, Abotaleb B, Altairi N, Del Fabbro M. Do osteoconductive bone substitutes result in similar bone regeneration for maxillary sinus augmentation when compared to osteogenic and osteoinductive bone grafts? A systematic review and frequentist network meta-analysis. *International journal of oral and maxillofacial surgery*. 49(1), 107-20 (2020).

[2] Bourdin A, Husereau D, Molinari N, et al. Matching-adjusted indirect comparison of benralizumab versus interleukin-5 inhibitors for the treatment of severe asthma: a systematic review. *European Respiratory Journal*. 52(5), (2018).

[3] Cope S, Clemens A, Hammes F, Noack H, Jansen JP. Critical appraisal of network meta-analyses evaluating the efficacy and safety of new oral anticoagulants in atrial fibrillation stroke prevention trials. *Value in Health*. 18(2), 234-49 (2015).

[4] Cope S, Toor K, Popoff E, et al. Critical appraisal of published indirect comparisons and network meta-analyses of competing interventions for multiple myeloma. *Value in Health*. 23(4), 441-50 (2020).

[5] Furukawa TA, Schramm E, Weitz ES, et al. Cognitive-Behavioural Analysis System of Psychotherapy (CBASP), a drug, or their combination: differential therapeutics for persistent depressive disorder: a study protocol of an individual participant data network meta-analysis. *BMJ open*. 6(5), e011769 (2016).

[6] Furukawa TA, Karyotaki E, Suganuma A, et al. Dismantling, personalising and optimising internet cognitive–behavioural therapy for depression: a study protocol for individual participant data component network meta-analysis. *BMJ open*. 8(11), e026137 (2018).

[7] Kanters S, Renaud F, Rangaraj A, et al. Evidence synthesis evaluating body weight gain among people treating HIV with antiretroviral therapy-a systematic literature review and network meta-analysis. *Eclinicalmedicine*. 48, 101412 (2022).

[8] Kovic B, Zoratti MJ, Michalopoulos S, Silvestre C, Thorlund K, Thabane L. Deficiencies in addressing effect modification in network meta-analyses: a meta-epidemiological survey. *Journal of Clinical Epidemiology*. 88, 47-56 (2017).

[9] McGirr A, Iqbal SM, Izurieta P, et al. A systematic literature review and network meta-analysis feasibility study to assess the comparative efficacy and comparative effectiveness of pneumococcal conjugate vaccines. *Human vaccines & immunotherapeutics*. 15(11), 2713-24 (2019).

[10] Menzies-Gow A, Steenkamp J, Singh S, et al. Tezepelumab compared with other biologics for the treatment of severe asthma: a systematic review and indirect treatment comparison. *Journal of Medical Economics*. 25(1), 679-90 (2022).

[11] Nikolin S, Owens K, Francis-Taylor R, et al. Comparative efficacy, cognitive effects and acceptability of electroconvulsive therapies for the treatment of depression: protocol for a systematic review and network meta-analysis. *BMJ open*. 12(12), e068313 (2022).

[12] Phillippo DM, Dias S, Elsada A, Ades A, Welton NJ. Population adjustment methods for indirect comparisons: a review of national institute for health and care excellence technology appraisals. *International journal of technology assessment in health care*. 35(3), 221-8 (2019).

[13] Rose CJ, Ohm IK, Giske L, Næss GE, Fretheim A. Effect modification in network meta-analyses of treatments for relapsing refractory multiple myeloma (RRMM): systematic review, meta-analysis, and simulation. *medRxiv*. 2022.05. 13.22275047 (2022).

[14] Saramago P, Gega L, Marshall D, et al. Digital interventions for Generalized Anxiety Disorder (GAD): systematic review and network meta-analysis. *Frontiers in psychiatry*. 2158 (2021).

[15] Veroniki AA, Straus SE, Ashoor HM, Hamid JS, Yu C, Tricco AC. Safety and effectiveness of long-acting versus intermediate-acting insulin for patients with type 1 diabetes: protocol for a systematic review and individual patient data network meta-analysis. *BMJ open*. 5(12), e010160 (2015).

[16] Wade R, Sharif-Hurst S, Dias S. Patient characteristics as effect modifiers for psoriasis biologic treatment response: an assessment using network meta-analysis subgroups. *Systematic reviews*. 9(1), 1-15 (2020).

[17] Wright E, Yasmeen N, Malottki K, et al. Assessing the quality and coherence of network meta-analyses of biologics in plaque psoriasis: what does all this evidence synthesis tell us? *Dermatology and therapy*. 11(1), 181-220 (2021).
